# Supplementary material for: Prevalence, classification and dental treatment requirements of dens invaginatus by cone-beam computed tomography
Source: PeerJ. 2022 Dec 5;10:e14450. doi: 10.7717/peerj.14450 (PMC9745910; doi:10.7717/peerj.14450)
Supplement: Supplemental Information 1 — The prevalence, characteristics, and types of dens invaginatus (DI). [file peerj-10-14450-s001.xlsx]

## Sheet: Sayfa1
Patient no	Age/ Gender	Oehler Classification/ #affected tooth	Crown morphology / affected tooth	Other Dental Anomaly in Anterior	Apical pathosis	Open Apex	Treatment
1	18/ ♂	TYPE 1 (ST, M), TYPE 2 (12)	BARREL (ST, M), NORMAL (12),	IT (11 13 21 22 23), ST	✖	✓ (12, ST,M)	ESO (M,ST), OT
2	12/♂	TYPE 1 (M)	NORMAL (M)	IT (21)	✖	✓	OT
3	13/♂	TYPE 1 (M) , DOUBLE TYPE 1 (M)	AMORF (M), BARREL (M)	IT (11), M	✖	✖ (M,M)	E (M), OT
4	12/♂	TYPE 1 (11, 12)	AMORF(11), NORMAL (12)	M	✖	✖(11, 12)	-
5	19/♀	TYPE 1 (M)	CONICAL	-	✖	✖	-
6	18/♀	TYPE 2 (22)	NORMAL (22)	ST	✖	✖	F (22)
7	59/♀	TYPE 1 (12)	NORMAL (12)	-	✖	✖	-
8	37/♀	TYPE 2 (12)	NORMAL(12)	-	✖	✖	F (12)
9	9/♂	TYPE 1 (22), DOUBLE TYPE 2 (M)	BARREL (M), NORMAL (22)	M	✖	✓ (22,M)	-
10	19/♂	TYPE 3B (13)	AMORF (13)		✓	✓	ESO (13),DEI
11	14/♂	TYPE 1 (12)	NORMAL (12)		✖	✓ (25), ✖(12)	OT
12	15/♀	TYPE 1 (M), TYPE 2 (M)	AMORF(M), BARREL (M)	IT (21), M	✖	✓ (M,M)	ESO (M,M), OT
13	11/♀	TYPE 2 (21)	NORMAL (21)		✖	✖	-
14	13/♂	TYPE 1 (12,22), DOUBLE TYPE 2 (M)	NORMAL (12,22,M)	IT (11,21), M	✖	✓(12,22,M)	ESO (M), OT
15	10/♂	TYPE 1 (22)	NORMAL (22)	ST, ST, ST	✖	✓(22)	-
16	14/♂	DOUBLE TYPE 2 (12, 22)	AMORF (12, 22)	IT (11,21), ST	✖	✖(12,22)	E (12,22), OT
17	17/♂	TYPE 1 (M),TYPE 2 (11)	AMORF (M), NORMAL (11)	IT(21)	✓ (11)	✓ (11), ✖ (M)	E (M), RCT (11), OT
18	31/♂	TYPE 2 (12)	NORMAL (12)	-	✓ (12)	✓	E (12), RCT (11, 21, 22), PS
19	14/♂	TYPE 1 (21 Fused with M)	AMORF (M)		✖	✖	E (21, M)
20	15/♀	TYPE 1 (12,22)	NORMAL (12,22)		✖	✖ (12,22)	F (12)
21	14/♀	DOUBLE TYPE 1 (M)	AMORF (M)	IT (11,21), M	✖	✓	ESO (M), OT
22	19/♀	TYPE 3A (13)	NORMAL (13)	-	✓	✓ (13)	E (13), DEI
23	13/♀	TYPE 1 (12,22)	BARREL (12, 22)	ST	✖	✓ (12,22)	-
24	19/♂	DOUBLE TYPE 1 (M)	AMORF (M)	IT (11,21), M	✖	✖	E (M), OT
25	44/♂	TYPE 2 (12)	NORMAL (12)	-	✖	✖	F (12)
26	28/♂	TYPE 2 (12,22)	NORMAL (12,22)	-	✓ (12)	✓(12), ✖ (22)	E (12), RCT (11, 21, 22), PS
27	12/♂	TYPE 2 (M)	AMORF (M)	IT (21,22), M	✖	✓	E (M), OT
28	20/♀	TYPE 1 (12,22)	NORMAL (12,22)		✓ (12)	✓(12), ✖ (22)	RCT (12)
29	14/♂	TYPE 1 (M)	AMORF (M)	IT (11)	✖	✓	ESO (M), OT
30	32/♂	TYPE 1 (ST)	AMORF (ST)	ST	✖	✖	-
31	32/♂	DOUBLE TYPE 2 (M)	AMORF (M)	IT (11,13)	✖	✖	OT
32	18/♂	TYPE 1 (12,22)	NORMAL (12,22)	-	✓ (12)	✓(12), ✖ (22)	RCT (12)
33	32/♀	TYPE 1 (22), TYPE 2 (12)	NORMAL (12,22)	-	✓ (12)	✓ (12), ✖ (22)	RCT (12)
34	14/♂	TYPE 1 (M), DOUBLE TYPE 2 (M)	AMORF (M,M)	IT (11,21)	✖	✓ (M,M)	E (M,M), OT
35	14/♂	TYPE 2 (22)	AMORF(22)	-	✓	✓	RCT (22)
36	14/♂	TYPE 1 (12)	CONICAL (12)	M	✖	✓	-
37	19/♂	TYPE 2 (12)	BARREL (12)	ST	✓	✖	RCT (12)
38	18/♂	TYPE 1 (22 Fused with M)	AMORF (22)	-	✓	✓ (22)	E (22,ST)
39	61/♀	TYPE 1 (12, 22)	NORMAL (12,22)	-	✖	✖	-
40	22/♂	TYPE 2 (42)	AMORF (42)	-	✓	✓	RCT (42)
41	9/♂	TYPE 1 (M)	AMORF (M)	-	✖	✓	-
42	14/♂	TYPE 3A (22)	AMORF (22)	-	✓	✓	E (22)
43	51/♂	TYPE 1 (12,22)	NORMAL (12,22)	-	✓ (12)	✖ (12,22)	RCT (11, 12, 13, 14), PS
44	9/♂	TYPE 1 (11, 21 ,22, 33), TYPE 2 (12)	BARREL (11,12,21,22) NORMAL (33)	DENS EVAGINATUS (32), TALON CUSP (11,12,21,22)	✖	✖	-
45	22/♀	DOUBLE TYPE 2 (ST)	AMORF (ST)	IT (23)	✖	✖	ESO (ST), OT
46	27/♀	TYPE 1 (12,22)	NORMAL (12,22)	-	✖	✖ (12,22)	-
47	33/♀	TYPE 1 (12)	NORMAL (12)	-	✖	✖	-
48	49/♀	TYPE 2 (22 Fused with ST)	AMORF (22)	-	✓	✖	RCT (12)
49	16/♀	TYPE 1 (12)	NORMAL (12)	IT (22)	✖	✖	-
DEI - Dental implant, E - Extraction, ESO- Extracted under surgical operation, F- Filling, M- Mesiodens, IT- Impacted teeth, OT- Orthodontic treatment, RCT- Root canal treatment, ST- Supernumerary teeth.
